# Supplementary material
Source: ML conference proceedings conference paper supplement (https://aclanthology.org/P19-3002)
Supplement: Note [file P19-3002.Note.pdf]

# Supplementary Note on "SLATE: A Super-Lightweight Annotation Tool for Experts"

**Jonathan K. Kummerfeld**  
Computer Science & Engineering  
University of Michigan  
Ann Arbor, MI, USA  
jkummerf@umich.edu

After publishing the paper another tool named SLATE was brought to our attention. This supplementary note is intended to recognise that work and clarify the different between the two tools.

The previous tool, "Segment and Link-based Annotation Tool, Enhanced", is a GUI web-based system that supports project management as well as annotation. Implemented in Java, with a Flash-based front-end, it depends on Tomcat (a web server) and MySQL (a database management system). It was first mentioned in Kaplan et al. (2010) and then fully presented by Kaplan et al. (2011). Code is available at <https://bitbucket.org/dainkaplan/slate/wiki/Home>. Compared to our tool, the motivation and results are quite different. They focus on providing an easy-to-use interface for non-expert computer users, while we focus on users comfortable in a terminal. As a result, their tool involves more effort to set up, but then users can interact with it entirely through a web browser.

## References

- Dain Kaplan, Ryu Iida, Kikuko Nishina, and Takenobu Tokunaga. 2011. Slate - a tool for creating and maintaining annotated corpora. *JLCL*.
- Dain Kaplan, Ryu Iida, and Takenobu Tokunaga. 2010. Annotation process management revisited. In *Proceedings of LREC*.
